# Supplementary material for: Mitochondrion-targeting PEGylated BODIPY dyes for near-infrared cell imaging and photodynamic therapy
Source: Royal Society of Chemistry journal article supplement (doi:10.1039/d1tb02393d), 2022-01-01
Supplement: d1tb02393d1.pdf [file d1tb02393d1.pdf]

## Supporting Information

### Mitochondrion-Targeting PEGylated BODIPY Dyes for Near-Infrared Cell Imaging and Photodynamic Therapy

Isabel Wen Badon, Chanwoo Kim, Jong Min Lim, Duy Khuong Mai, Temmy Pegarro Vales, Dongho Kang, Sung Cho, Joomin Lee, Ho-Joong Kim, and Jaesung Yang

#### Contents

|                                                                 |     |
|-----------------------------------------------------------------|-----|
| I. Concentration-dependent fluorescence intensity spectra ..... | S2  |
| II. Singlet oxygen generation efficiency in aqueous media ..... | S3  |
| III. Optimized structures of AmBXI .....                        | S4  |
| IV. Effects of AmBXI on apoptosis in cancer cells .....         | S5  |
| V. NMR spectra .....                                            | S6  |
| 1. AmBDP (1) .....                                              | S6  |
| 2. MonobromoAmBDP (2) .....                                     | S7  |
| 3. DibromoAmBDP (3) .....                                       | S8  |
| 4. Tosyl-triethylene glycol .....                               | S9  |
| 5. 3,4-(ditriethylene glycol) carboxaldehyde (4) .....          | S10 |
| 6. AmBH-PEG (5) .....                                           | S11 |
| 7. AmBM-PEG (6) .....                                           | S12 |
| 8. AmBBr-PEG (7) .....                                          | S13 |
| 9. AmBHI .....                                                  | S14 |
| 10. AmBMI .....                                                 | S15 |
| 11. AmBBrI .....                                                | S16 |

## I. Concentration-dependent fluorescence intensity spectra

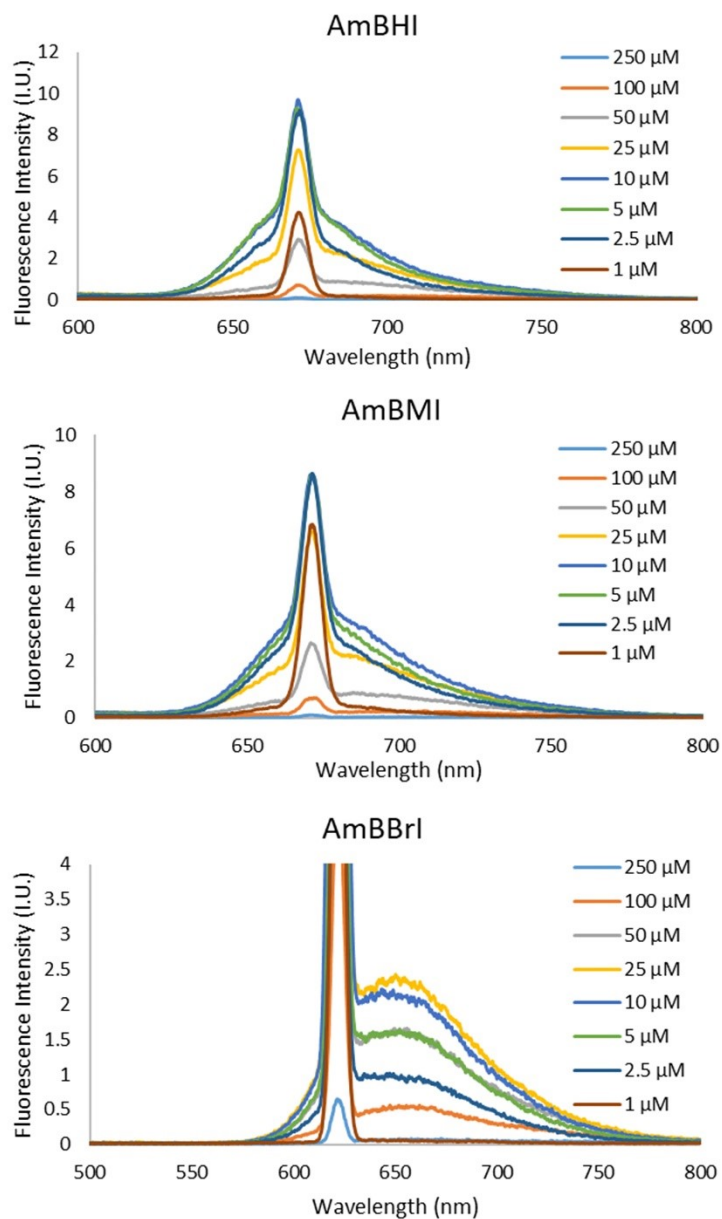

**Figure S1.** Concentration-dependent emission spectra of AmbXI dyes dissolved in water taken at room temperature. The excitation wavelength used was 662 nm for AmbBHI and AmbBMI and 612 nm for AmbBBrI.

## II. Singlet oxygen generation efficiency in aqueous media

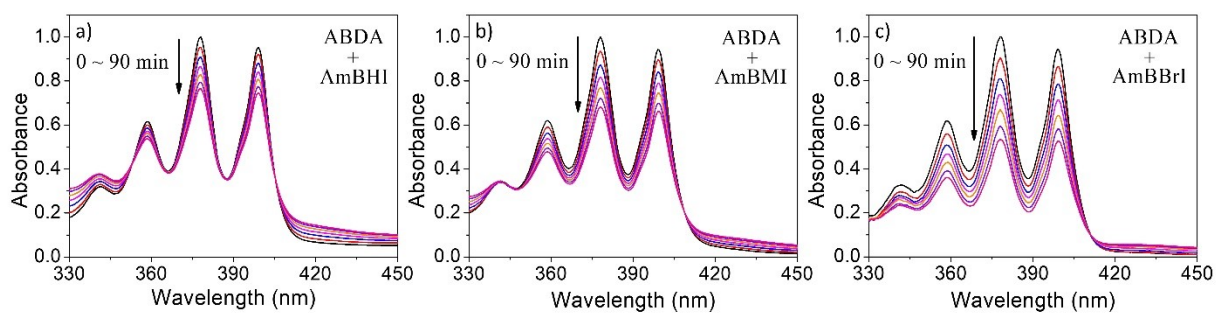

**Figure S2.** Singlet oxygen generation in aqueous media. Time-dependent absorption spectra of air-saturated water solutions of ABDA containing a)  $\Delta$ MBHI, b)  $\Delta$ MBMI, and c) AmBBrl under irradiation of 660 nm LED light.

### III. Optimized structures of AmBXI

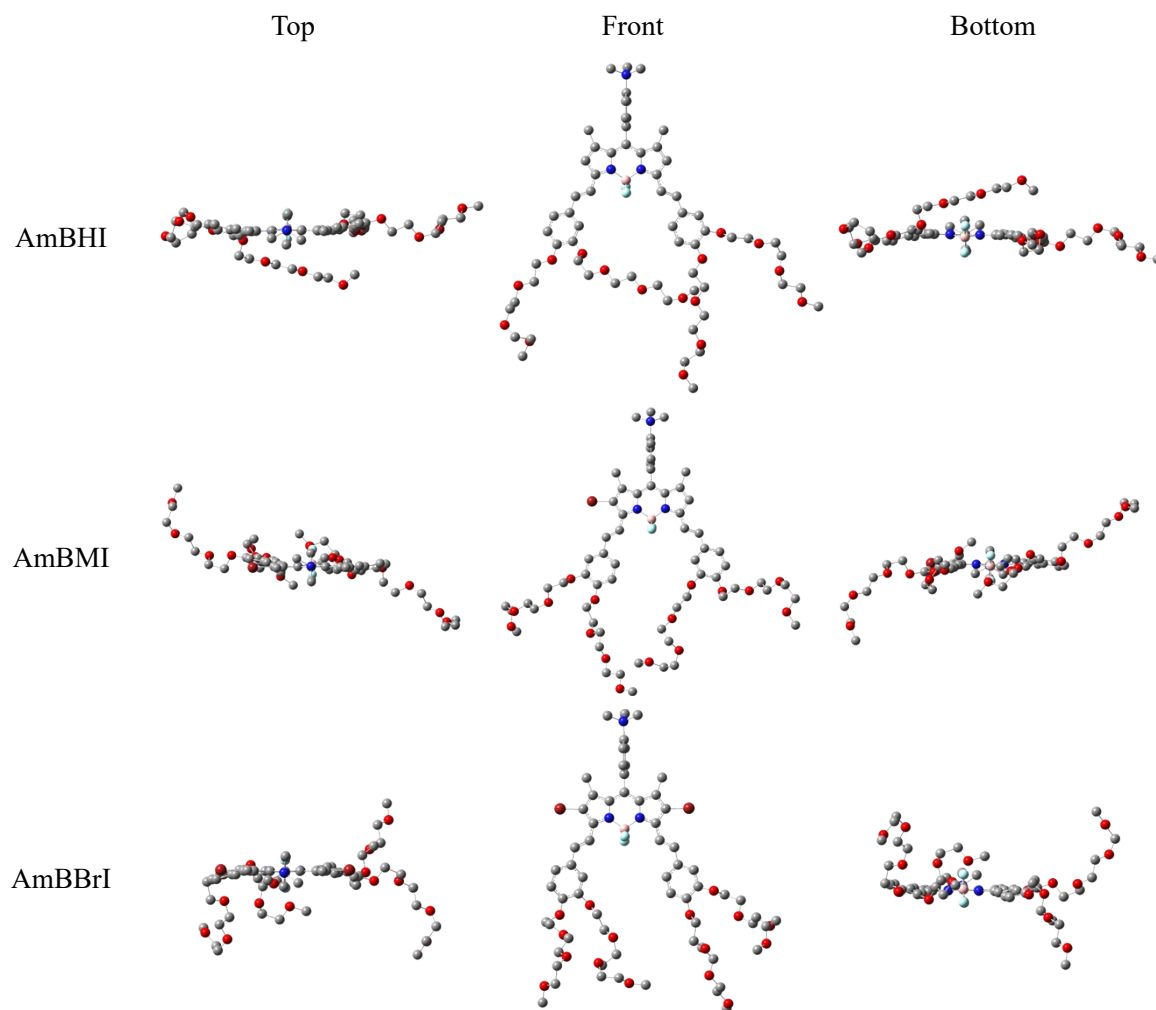

**Figure S3.** The optimized geometry of complete structures of BODIPY dyes. To clarify the optimized structures, hydrogen atoms are not shown in Figure. The coplanarity of the BODIPY core and the styryl group was confirmed through the three viewpoints: Top view (Left), Front view (middle), Bottom view (Right).

#### IV. Effects of AmBXI on apoptosis in cancer cells

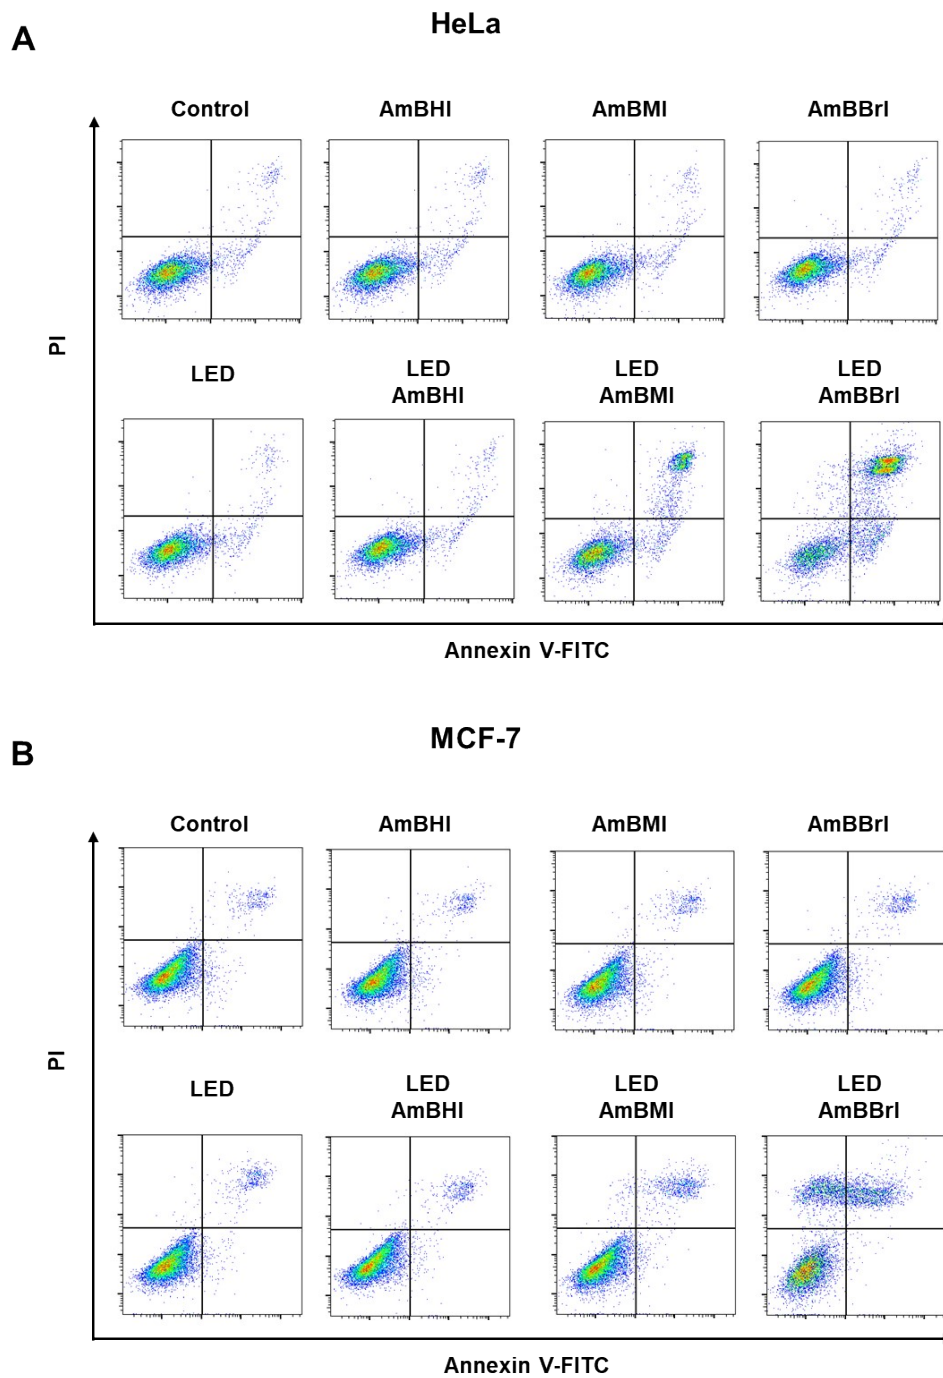

**Figure S4.** Effects of AmBXI on apoptosis in cancer cells.

## V. Spectra

### 1. AmBDP (1)

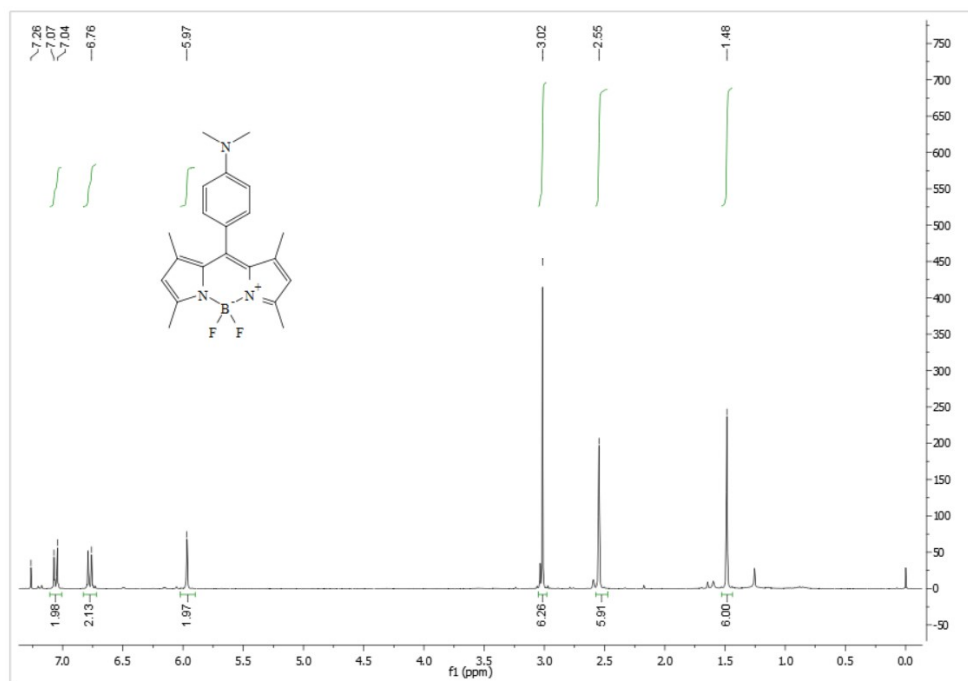

**Figure S5.** The  $^1\text{H}$  NMR spectrum of AmBDP (1).

## 2. MonobromoAmBDP (2)

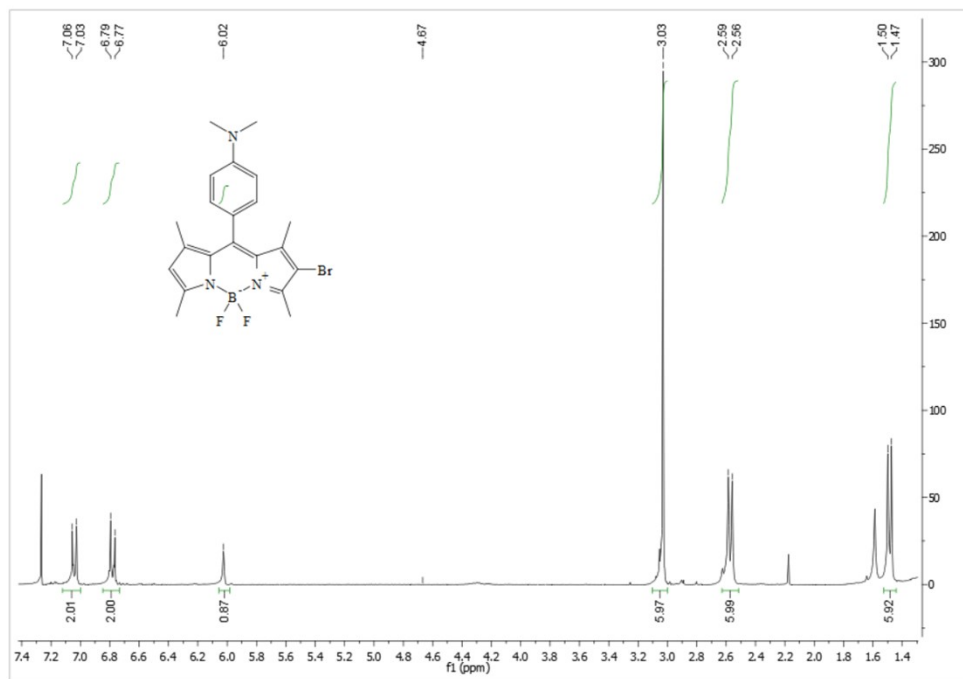

**Figure S6.** The <sup>1</sup>H NMR spectrum of monobromoAmBDP (2).

### 3. DibromoAmBDP (3)

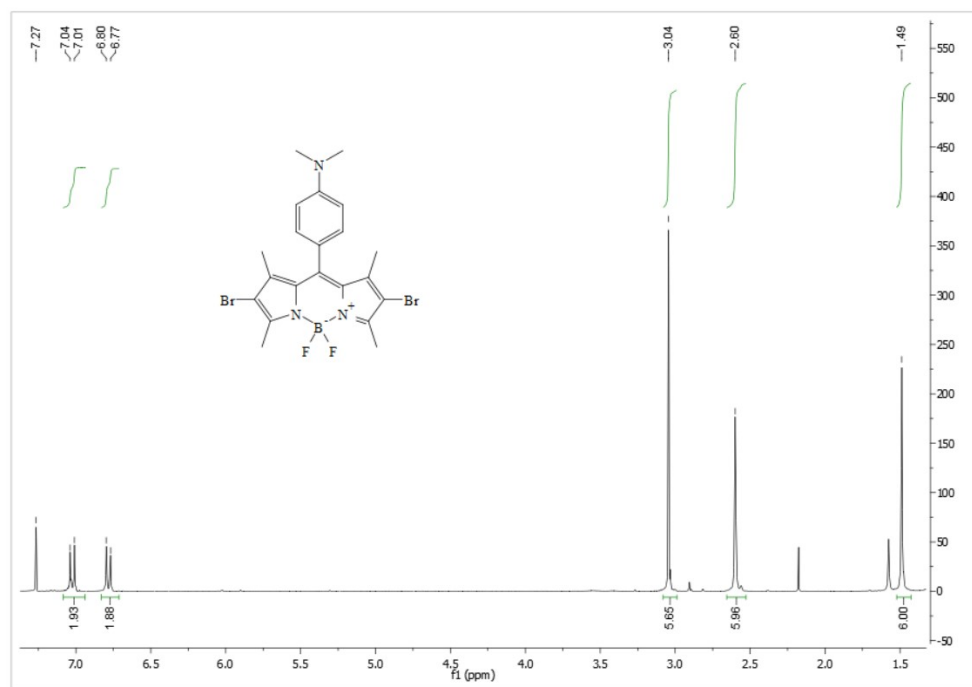

**Figure S7.** The <sup>1</sup>H NMR spectrum of dibromoAmBDP (3).



#### 4. Tosyl-triethylene glycol

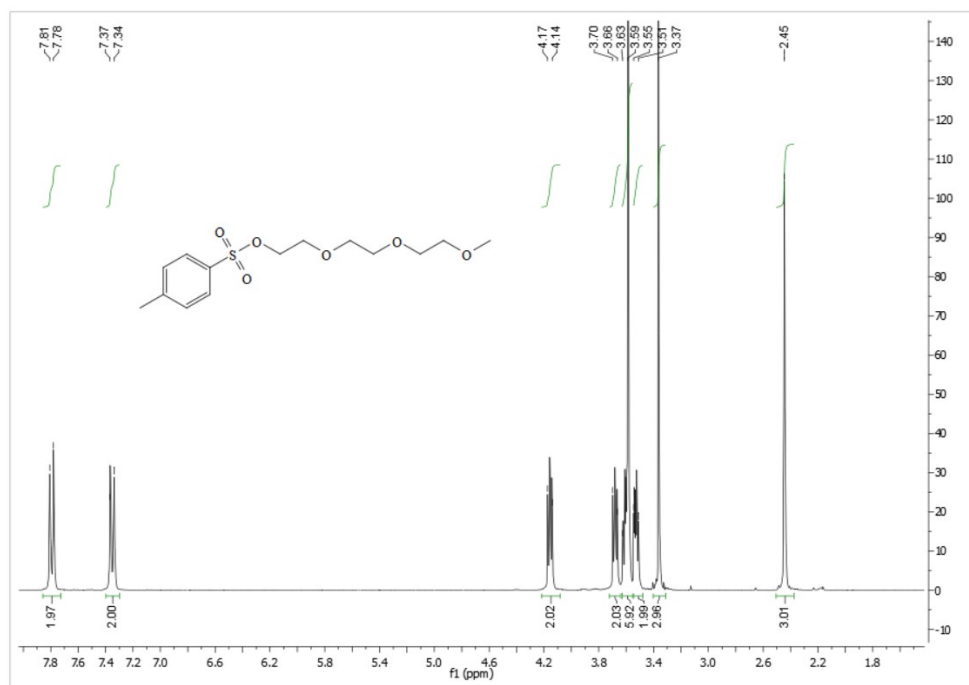

**Figure S8.** The  $^1\text{H}$  NMR spectrum of tosyl-triethylene glycol.

5. 3,4-(ditriethylene glycol) carboxaldehyde (**4**)

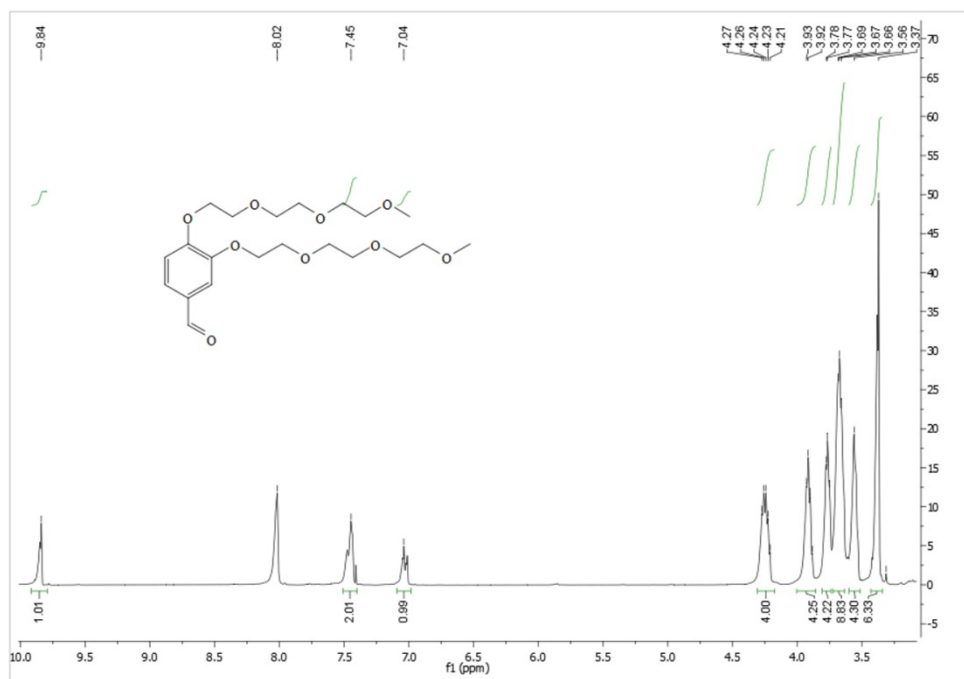

**Figure S9.** The <sup>1</sup>H NMR spectrum of 3,4-(ditriethylene glycol) carboxaldehyde (**4**).

## 6. AmBH-PEG (5)

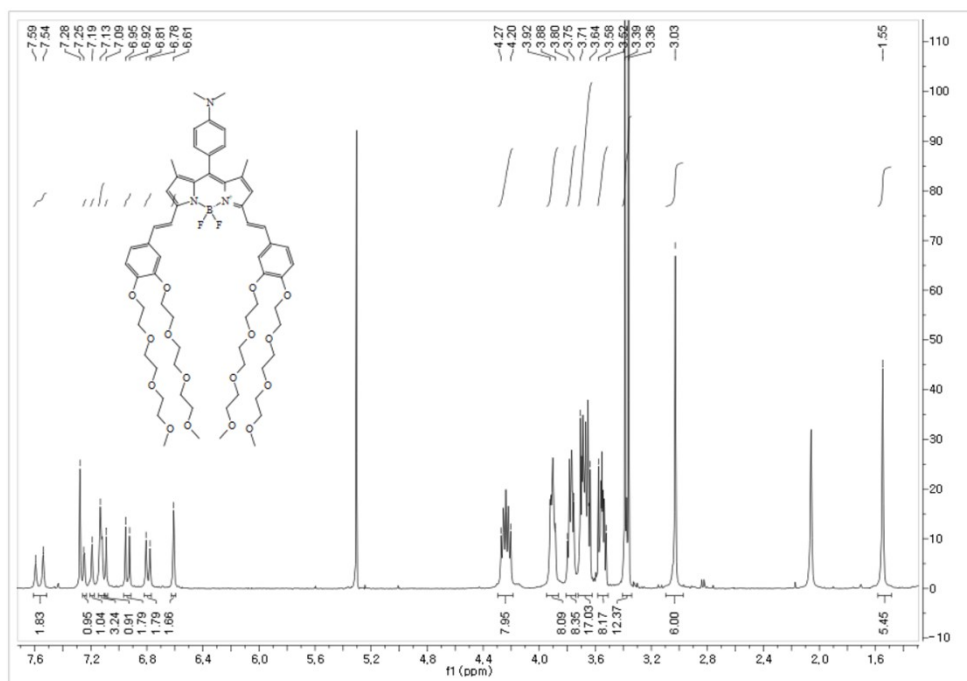

**Figure S10.** The <sup>1</sup>H NMR spectrum of AmBH-PEG (5).

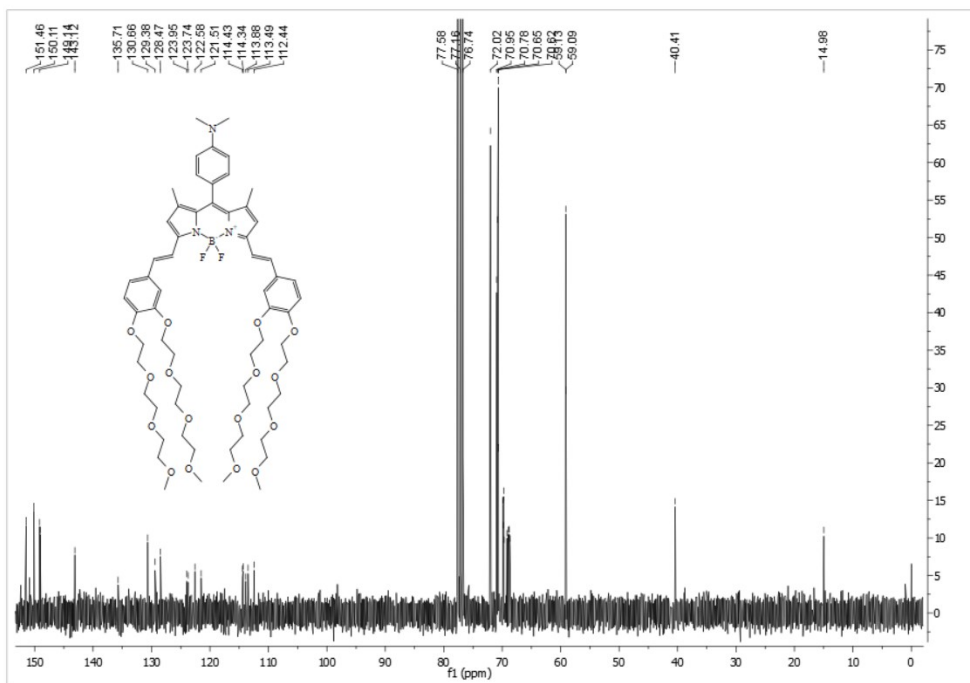

**Figure S11.** The <sup>13</sup>C NMR spectrum of AmBH-PEG (5).

## 7. AmBM-PEG (6)

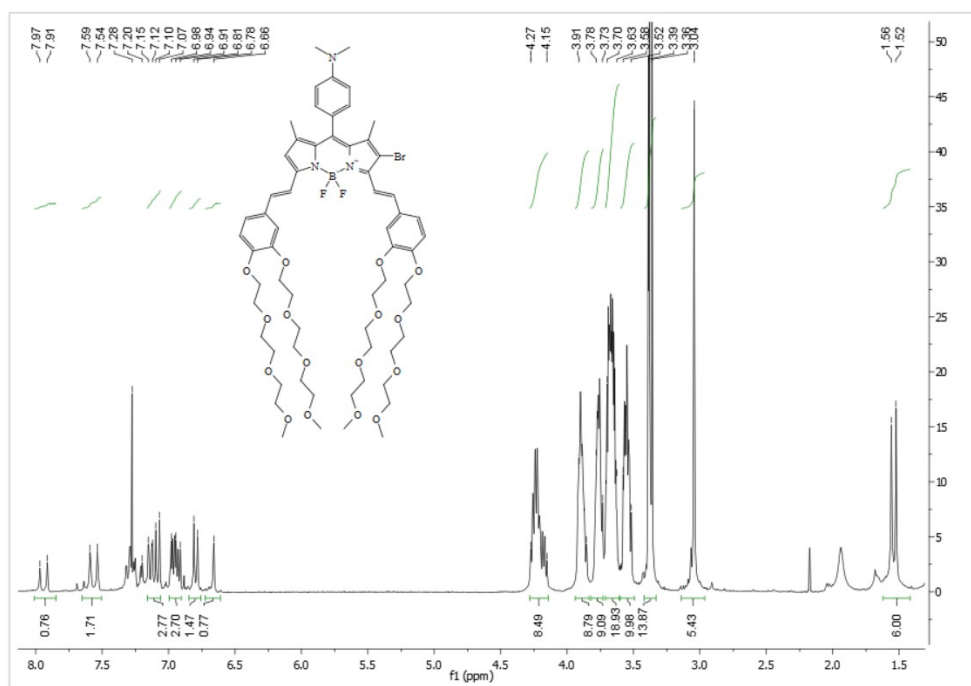

Figure S12. The <sup>1</sup>H NMR spectrum of AmBM-PEG (6).

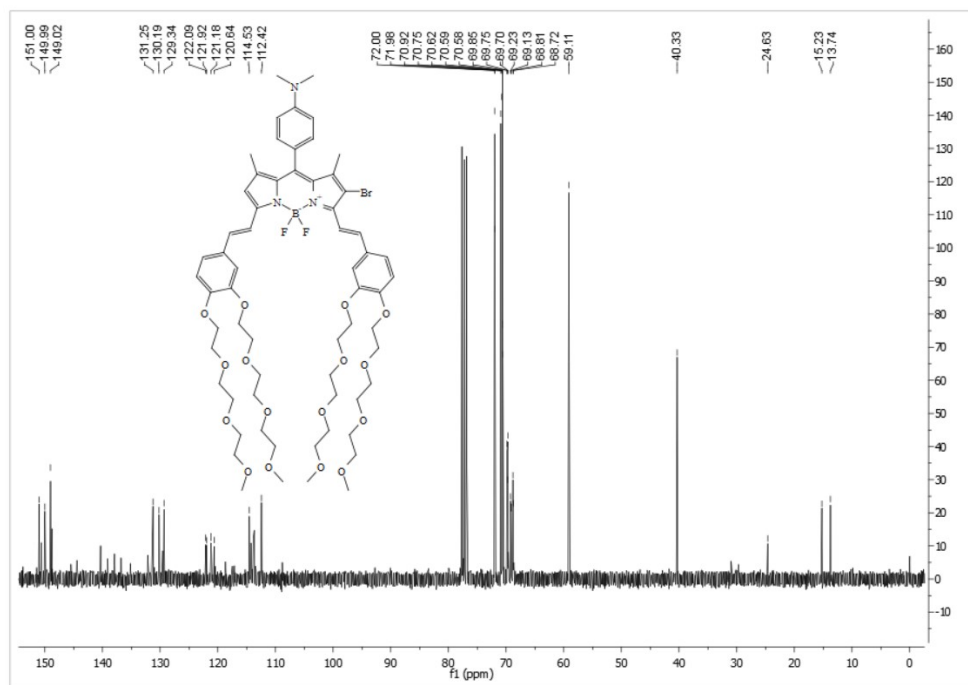

Figure S13. The <sup>13</sup>C NMR spectrum of AmBM-PEG (6).

## 8. AmBBr-PEG (7)

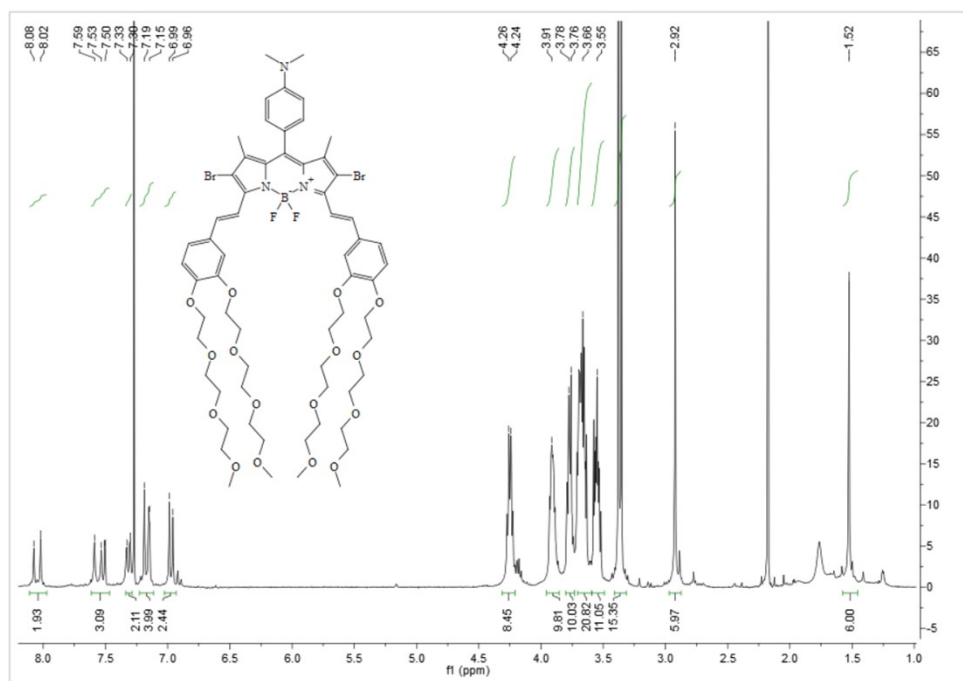

Figure S14. The <sup>1</sup>H NMR spectrum of AmBBr-PEG (7).

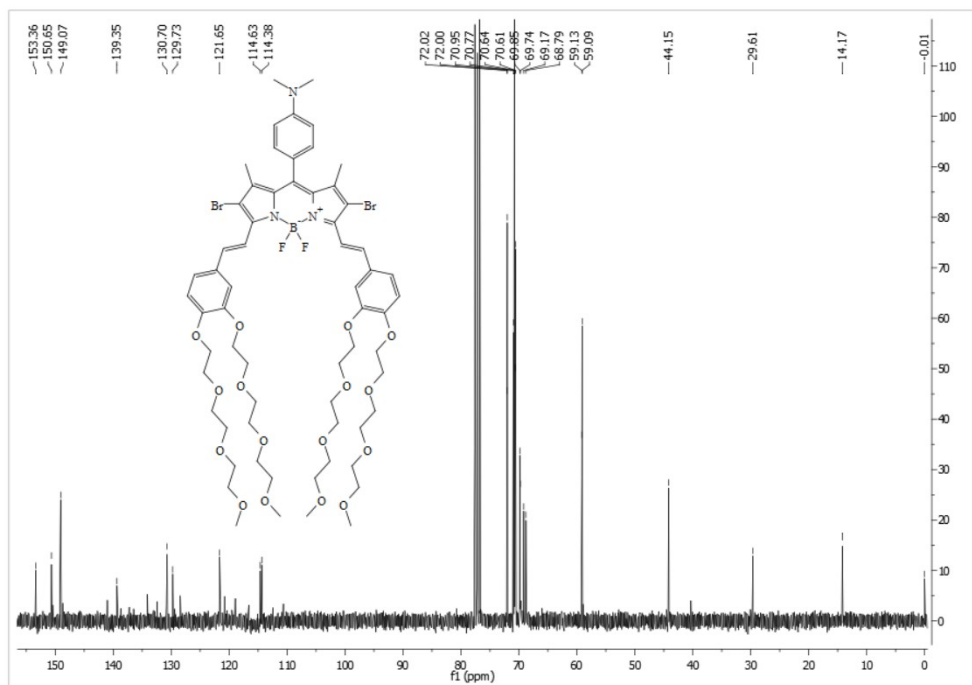

Figure S15. The <sup>13</sup>C NMR spectrum of AmBBr-PEG (7).

## 9. AmBHI

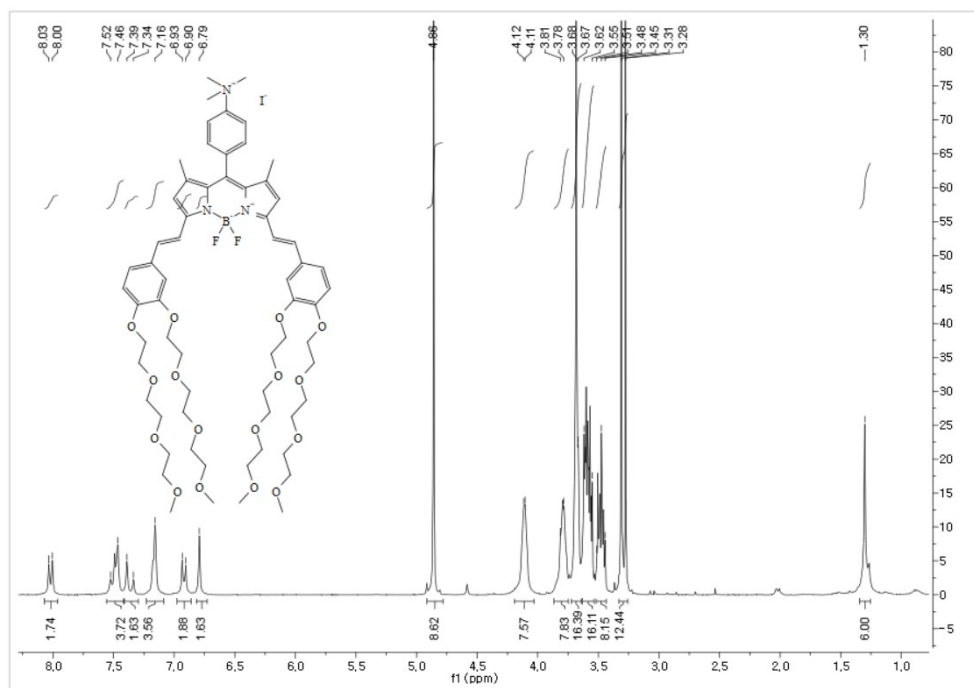

Figure S16. The <sup>1</sup>H NMR spectrum of AmBHI.

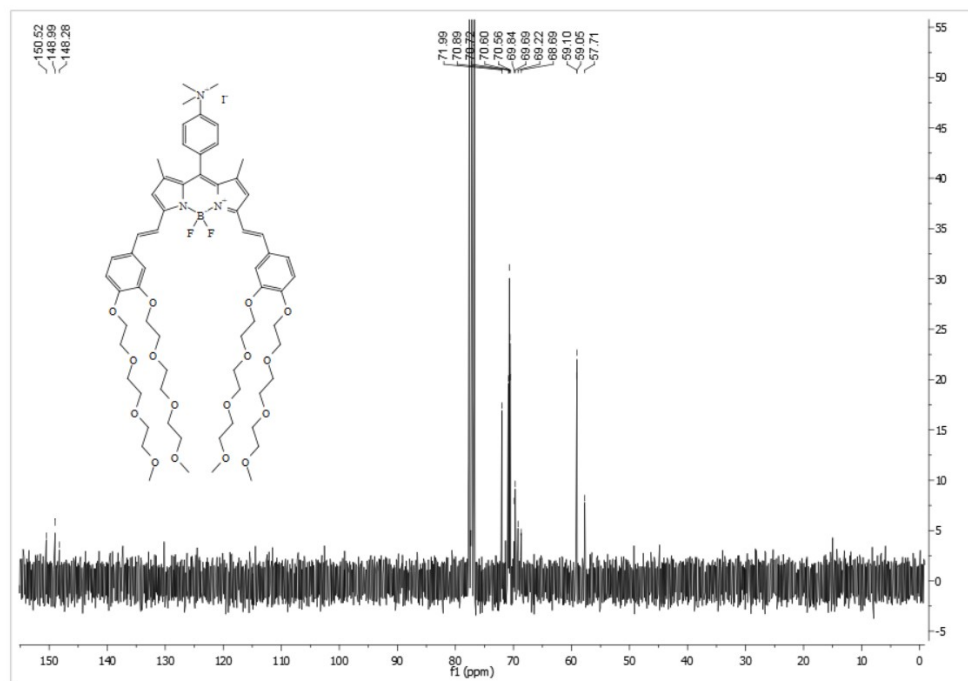

Figure S17. The <sup>13</sup>C NMR spectrum of AmBHI.

## 10. AmBMI

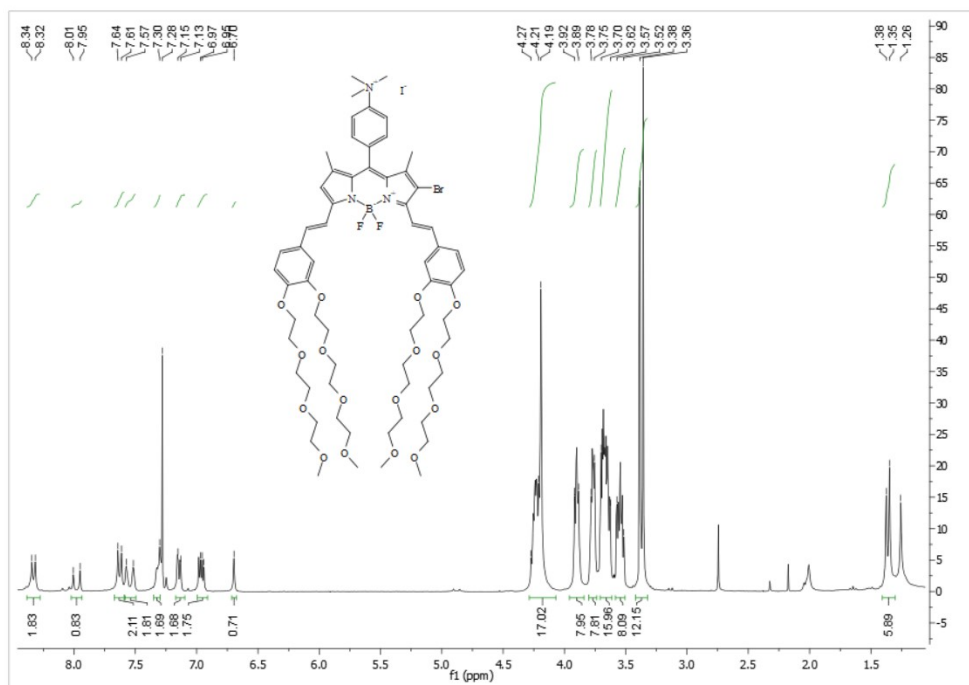

Figure S18. The <sup>1</sup>H NMR spectrum of AmBMI.

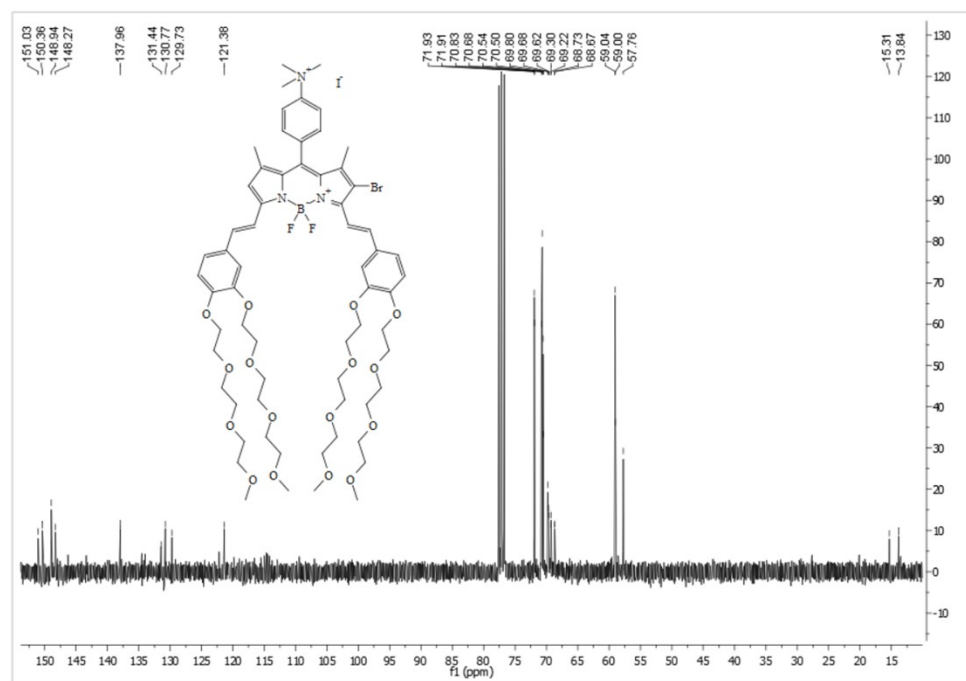

Figure S19. The <sup>13</sup>C NMR spectrum of AmBMI.

11. AmBBrI

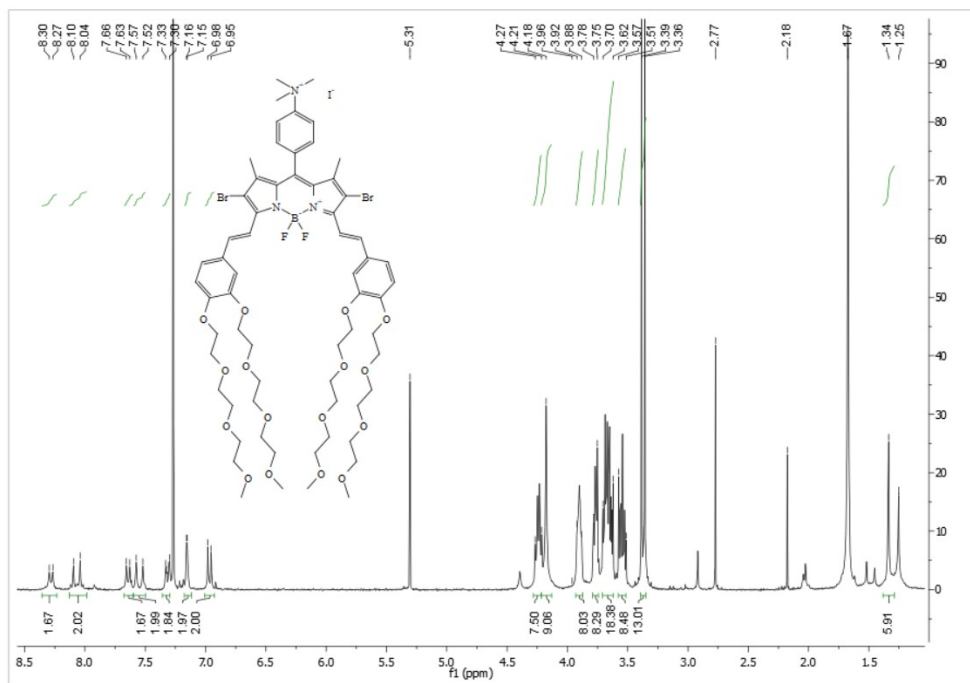

Figure S20. The  $^1\text{H}$  NMR spectrum of AmBBrI.

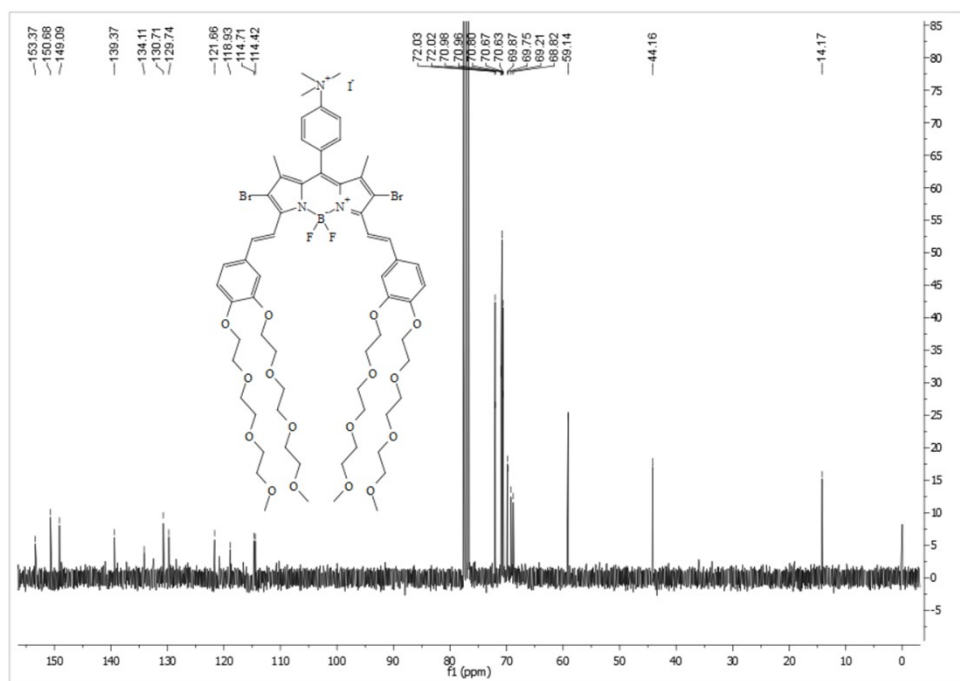

Figure S21. The  $^{13}\text{C}$  NMR spectrum of AmBBrI.
